# Supplementary material for: iPSC-induced neurons with the V337M MAPT mutation are selectively vulnerable to caspase-mediated cleavage of tau and apoptotic cell death
Source: Research Square preprint supplement (doi:10.21203/rs.3.rs-300172/v2), 2021-04-26
Supplement: Supplementary file 1 [file 78e5aff5e03ffd509b2bd00c.pdf]

**a Cytotoxicity levels (24h treatment)**

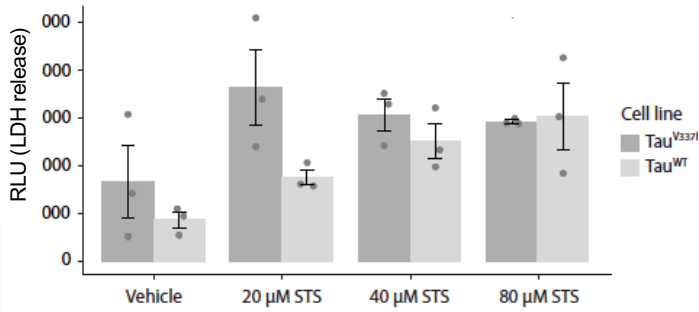

**b Cytotoxicity levels (48h treatment)**

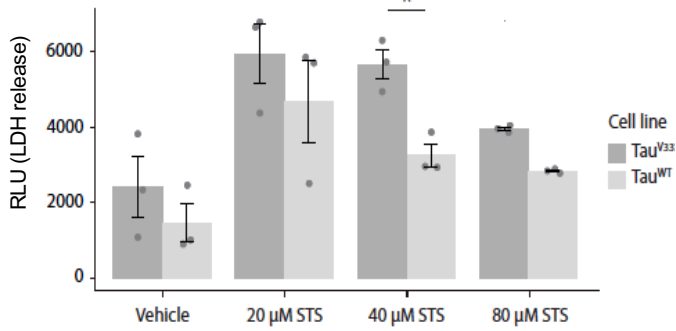

**c Cytotoxicity levels**

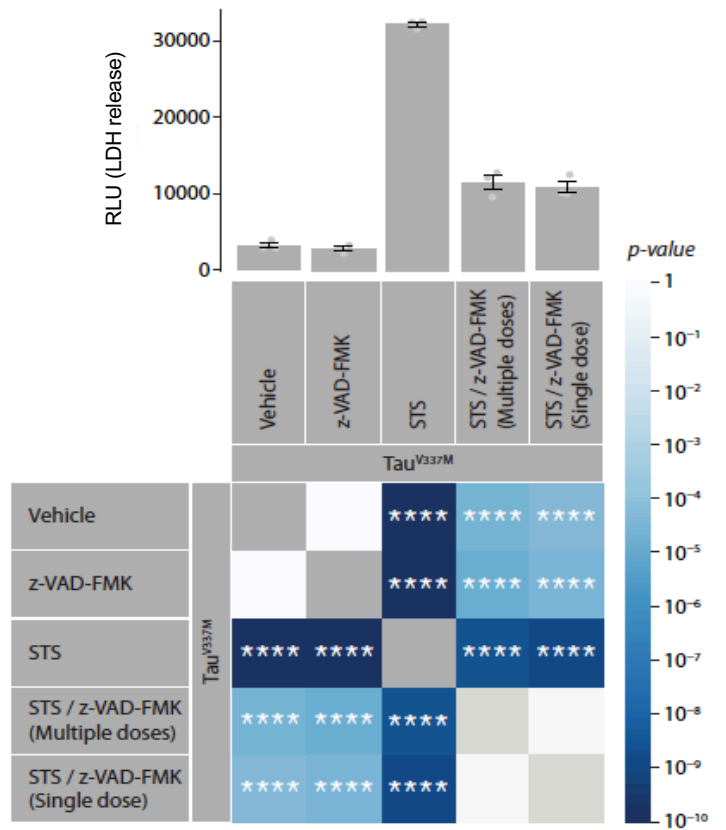

**Fig. S5**
